# Supplementary material
Source: PubMed Central journal article supplement (PMC5586222)

Supplementary Figure 1 - uncropped scans of the westerns, Ponceau S stains, and silver gel depicted in main or extended data figures

Figure 3d

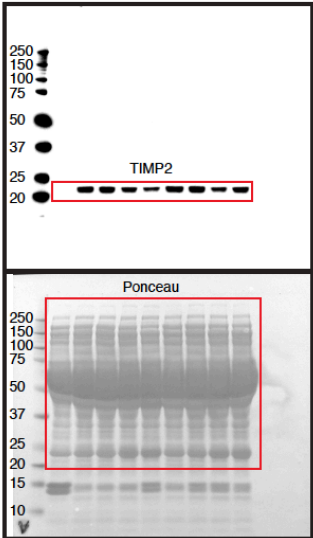

Extended Data Figure 7a

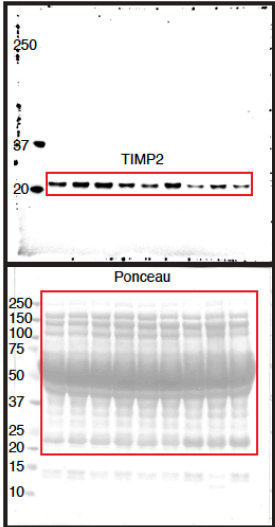

Extended Data Figure 7c

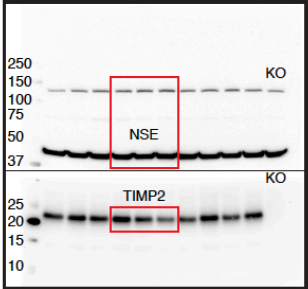

Extended Data Figure 10c

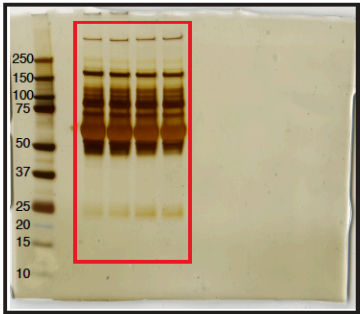

Supplement: NIHMS901457-supplement-Suppl__Fig__1.pdf [file NIHMS901457-supplement-Suppl__Fig__1.pdf]
